# Supplementary material for: Analysis of the Expression and Function of Key Genes in Pepper Under Low-Temperature Stress
Source: Front Plant Sci. 2022 May 4;13:852511. doi: 10.3389/fpls.2022.852511 (PMC9116226; doi:10.3389/fpls.2022.852511)
Supplement: Supplementary file 10 [file Table_10.XLSX]

## Sheet: Sheet1
Supplementary-Table S10 All GO terms enrichment in root Up regulated genes
GO	NS	enrichment	name	ratio_in_study	ratio_in_pop	p_uncorrected	depth	study_count	p_fdr_bh	study_items
GO:0009415	BP	e	response to water	15/1550	66/35336	1.30174e-07	4	15	2.28041e-05	Capana00g003114, Capana00g004275, Capana00g004545, Capana01g002355, Capana02g000471, Capana02g000492, Capana02g002739, Capana03g003736, Capana04g000100, Capana08g001007, Capana08g001008, Capana08g002571, Capana08g002792, Capana09g000936, Capana10g002137
GO:0001101	BP	e	response to acid chemical	15/1550	67/35336	1.60947e-07	3	15	2.65838e-05	Capana00g003114, Capana00g004275, Capana00g004545, Capana01g002355, Capana02g000471, Capana02g000492, Capana02g002739, Capana03g003736, Capana04g000100, Capana08g001007, Capana08g001008, Capana08g002571, Capana08g002792, Capana09g000936, Capana10g002137
GO:0006952	BP	e	defense response	22/1550	171/35336	6.3982e-06	3	22	0.000860186	Capana00g001496, Capana00g001497, Capana00g001498, Capana00g002760, Capana02g001800, Capana02g001846, Capana03g004443, Capana03g004445, Capana03g004449, Capana03g004450, Capana05g000349, Capana05g000372, Capana05g001330, Capana05g002551, Capana06g002023, Capana06g002950, Capana08g000223, Capana11g000102, Capana12g002081, Capana12g002446, Capana12g002449, Capana12g002450
GO:0006721	BP	e	terpenoid metabolic process	11/1550	59/35336	4.48526e-05	6	11	0.00480172	Capana00g001496, Capana00g001497, Capana00g001498, Capana01g002623, Capana01g002809, Capana03g002170, Capana04g002519, Capana12g002446, Capana12g002449, Capana12g002450, Capana12g002714
GO:1901700	BP	e	response to oxygen-containing compound	21/1550	183/35336	5.80393e-05	3	21	0.00599152	Capana00g002001, Capana00g003114, Capana00g004275, Capana00g004545, Capana01g002355, Capana02g000471, Capana02g000492, Capana02g002739, Capana03g002301, Capana03g003736, Capana04g000100, Capana05g000349, Capana06g000862, Capana08g001007, Capana08g001008, Capana08g002571, Capana08g002792, Capana09g000936, Capana10g001138, Capana10g002137, Capana12g000060
GO:0005634	CC	e	nucleus	160/1550	2338/35336	1.89816e-08	5	160	3.78388e-06	Capana00g000817, Capana00g001493, Capana00g002230, Capana00g003083, Capana00g004028, Capana00g004030, Capana00g004112, Capana00g004140, Capana00g004561, Capana00g004634, Capana00g004852, Capana01g000046, Capana01g000650, Capana01g000654, Capana01g000661, Capana01g000677, Capana01g001063, Capana01g001360, Capana01g001421, Capana01g001479, Capana01g002355, Capana01g003989, Capana01g003993, Capana01…
GO:0003700	MF	e	DNA-binding transcription factor activity	81/1550	634/35336	7.27308e-18	2	81	1.05114e-14	Capana00g002230, Capana00g002726, Capana00g003083, Capana00g004112, Capana00g004511, Capana00g004561, Capana00g004634, Capana00g004852, Capana01g000046, Capana01g000661, Capana01g000677, Capana01g001360, Capana01g001692, Capana01g002675, Capana01g003993, Capana01g004444, Capana01g004446, Capana01g004449, Capana01g004472, Capana02g000632, Capana02g000680, Capana02g001381, Capana02g001490, Capana02…
GO:0140110	MF	e	transcription regulator activity	87/1550	737/35336	6.03947e-17	1	87	6.98283e-14	Capana00g002230, Capana00g002726, Capana00g003083, Capana00g004112, Capana00g004275, Capana00g004511, Capana00g004561, Capana00g004634, Capana00g004852, Capana01g000046, Capana01g000661, Capana01g000677, Capana01g001360, Capana01g001692, Capana01g002675, Capana01g003993, Capana01g004444, Capana01g004446, Capana01g004449, Capana01g004472, Capana02g000632, Capana02g000680, Capana02g001381, Capana02…
GO:0043565	MF	e	sequence-specific DNA binding	43/1550	353/35336	1.75087e-09	5	43	4.60081e-07	Capana00g003083, Capana00g004112, Capana00g004275, Capana00g004852, Capana01g000046, Capana01g001063, Capana01g004472, Capana02g000407, Capana02g000632, Capana02g000680, Capana02g001490, Capana02g002230, Capana02g003134, Capana02g003339, Capana02g003661, Capana03g000473, Capana03g001100, Capana03g001463, Capana03g003818, Capana04g000272, Capana05g001065, Capana05g001458, Capana06g001110, Capana06…
GO:0102698	MF	e	5-epi-aristolochene synthase activity	6/1550	8/35336	1.83093e-07	5	6	2.86071e-05	Capana00g001496, Capana00g001497, Capana00g001498, Capana12g002446, Capana12g002449, Capana12g002450
GO:0005509	MF	e	calcium ion binding	32/1550	308/35336	7.47873e-06	5	32	0.000982603	Capana00g000202, Capana00g000272, Capana00g002126, Capana00g003134, Capana00g003231, Capana02g002124, Capana02g002878, Capana02g003359, Capana02g003630, Capana03g000795, Capana03g000955, Capana03g001781, Capana04g000537, Capana04g000538, Capana04g002868, Capana05g000028, Capana07g001575, Capana07g002144, Capana08g000786, Capana08g001121, Capana08g002381, Capana08g002673, Capana09g001401, Capana09…
GO:0015035	MF	e	protein-disulfide reductase activity	14/1550	89/35336	3.21942e-05	5	14	0.00372229	Capana00g003189, Capana00g003875, Capana01g003136, Capana01g003140, Capana02g002755, Capana02g003518, Capana03g003568, Capana04g000290, Capana05g000007, Capana06g003017, Capana07g001774, Capana07g002194, Capana08g000303, Capana10g000465
GO:0003677	MF	e	DNA binding	142/1550	2298/35336	3.74923e-05	4	142	0.00417017	Capana00g002230, Capana00g003083, Capana00g004112, Capana00g004205, Capana00g004275, Capana00g004561, Capana00g004634, Capana00g004852, Capana01g000046, Capana01g000650, Capana01g000654, Capana01g000661, Capana01g000677, Capana01g001063, Capana01g001221, Capana01g001360, Capana01g003989, Capana01g003993, Capana01g004120, Capana01g004444, Capana01g004446, Capana01g004449, Capana01g004472, Capana02…
GO:0015036	MF	e	disulfide oxidoreductase activity	14/1550	91/35336	4.15267e-05	4	14	0.00452954	Capana00g003189, Capana00g003875, Capana01g003136, Capana01g003140, Capana02g002755, Capana02g003518, Capana03g003568, Capana04g000290, Capana05g000007, Capana06g003017, Capana07g001774, Capana07g002194, Capana08g000303, Capana10g000465
